# Supplementary material
Source: MDPI journal article supplement (https://www.mdpi.com/2227-9717/10/2/247)
Supplement: s1 [file s1]

Supporting Information

# Unveiling the Temperature Influence on the Sorptive Behavior of ZIF-8 Composite Materials Impregnated with [C<sub>n</sub>MIM][B(CN)<sub>4</sub>] Ionic Liquids

Tiago J. Ferreira <sup>1</sup>, Laura M. Esteves <sup>1</sup>, José M. S. S. Esperança <sup>1,\*</sup>, Isabel A. A. C. Esteves <sup>1,\*</sup>

<sup>1</sup> LAQV/REQUIMTE, Departamento de Química, Faculdade de Ciências e Tecnologia, Universidade NOVA de Lisboa, 2829-516, Caparica, Portugal

\* Correspondence: jmesp@fct.unl.pt (José M. S. S. Esperança); i.esteves@fct.unl.pt (Isabel A. A. C. Esteves)

## S1. Single-component CO<sub>2</sub>, CH<sub>4</sub> and N<sub>2</sub> adsorption-desorption data of ZIF-8 and IL@ZIF-8 composites at 303 K

**Table S1.** CO<sub>2</sub>, CH<sub>4</sub> and N<sub>2</sub> adsorption-desorption equilibrium data at 303 K for pristine ZIF-8.

| CO <sub>2</sub> – 303 K |                                  | CH <sub>4</sub> – 303 K |                                  | N <sub>2</sub> – 303 K |                                  |
|-------------------------|----------------------------------|-------------------------|----------------------------------|------------------------|----------------------------------|
| <i>P</i> (bar)          | <i>q</i> <sub>exc</sub> (mol/kg) | <i>P</i> (bar)          | <i>q</i> <sub>exc</sub> (mol/kg) | <i>P</i> (bar)         | <i>q</i> <sub>exc</sub> (mol/kg) |
| 0.057                   | 0.032                            | 0.500                   | 0.116                            | 0.502                  | 0.049                            |
| 0.315                   | 0.186                            | 0.998                   | 0.238                            | 1.001                  | 0.089                            |
| 0.808                   | 0.488                            | 3.073                   | 0.706                            | 2.943                  | 0.258                            |
| 1.572                   | 0.909                            | 5.877                   | 1.294                            | 6.049                  | 0.505                            |
| 2.596                   | 1.603                            | 8.007                   | 1.694                            | 7.989                  | 0.645                            |
| 4.492                   | 2.902                            | 11.949                  | 2.319                            | 12.079                 | 0.930                            |
| 7.11                    | 4.429                            | 15.980                  | 2.821                            | 16.010                 | 1.165                            |
| 9.55                    | 5.445                            | 14.019                  | 2.586                            | 14.009                 | 1.047                            |
| 13.699                  | 6.539                            | 10.017                  | 2.023                            | 9.893                  | 0.789                            |
| 16.141                  | 6.953                            | 4.539                   | 1.026                            | 4.512                  | 0.395                            |
| 10.577                  | 5.813                            | 1.939                   | 0.449                            | 1.986                  | 0.180                            |
| 8.283                   | 4.980                            | 0.698                   | 0.170                            | 0.702                  | 0.066                            |
| 5.987                   | 3.856                            |                         |                                  |                        |                                  |
| 3.562                   | 2.294                            |                         |                                  |                        |                                  |
| 1.959                   | 1.190                            |                         |                                  |                        |                                  |
| 1.293                   | 0.746                            |                         |                                  |                        |                                  |
| 0.499                   | 0.320                            |                         |                                  |                        |                                  |
| 0.168                   | 0.117                            |                         |                                  |                        |                                  |

**Table S2.** CO<sub>2</sub>, CH<sub>4</sub> and N<sub>2</sub> adsorption-desorption equilibrium data at 303 K for [C<sub>6</sub>MIM][B(CN)<sub>4</sub>]@ZIF-8 (low).

| CO <sub>2</sub> – 303 K |                                  | CH <sub>4</sub> – 303 K |                                  | N <sub>2</sub> – 303 K |                                  |
|-------------------------|----------------------------------|-------------------------|----------------------------------|------------------------|----------------------------------|
| <i>P</i> (bar)          | <i>q</i> <sub>exc</sub> (mol/kg) | <i>P</i> (bar)          | <i>q</i> <sub>exc</sub> (mol/kg) | <i>P</i> (bar)         | <i>q</i> <sub>exc</sub> (mol/kg) |
| 2.974                   | 1.429                            | 0.500                   | 0.098                            | 0.502                  | 0.038                            |
| 6.067                   | 3.080                            | 0.998                   | 0.189                            | 1.001                  | 0.075                            |
| 7.944                   | 3.782                            | 3.073                   | 0.577                            | 2.943                  | 0.214                            |
| 12.810                  | 5.088                            | 5.877                   | 1.058                            | 6.049                  | 0.420                            |
| 15.961                  | 5.580                            | 8.007                   | 1.38                             | 7.989                  | 0.547                            |
| 14.061                  | 5.311                            | 11.950                  | 1.883                            | 12.079                 | 0.784                            |
| 10.044                  | 4.479                            | 15.980                  | 2.291                            | 16.010                 | 0.968                            |
| 4.570                   | 2.337                            | 14.020                  | 2.103                            | 14.009                 | 0.875                            |
| 1.962                   | 0.946                            | 10.017                  | 1.650                            | 9.893                  | 0.665                            |
| 0.720                   | 0.359                            | 4.539                   | 0.833                            | 4.512                  | 0.337                            |
|                         |                                  | 1.939                   | 0.369                            | 1.986                  | 0.158                            |
|                         |                                  | 0.698                   | 0.134                            | 0.702                  | 0.056                            |

**Table S3.** CO<sub>2</sub> adsorption-desorption equilibrium data at 303 K for [C<sub>n</sub>MIM][B(CN)<sub>4</sub>]@ZIF-8 materials.

| CO <sub>2</sub> – 303 K                                   |                                  |                                                       |                                  |                                                        |                                  |
|-----------------------------------------------------------|----------------------------------|-------------------------------------------------------|----------------------------------|--------------------------------------------------------|----------------------------------|
| [C <sub>6</sub> MIM][B(CN) <sub>4</sub> ]@ZIF-8 (low) - 2 |                                  | [C <sub>2</sub> MIM][B(CN) <sub>4</sub> ]@ZIF-8 (low) |                                  | [C <sub>6</sub> MIM][B(CN) <sub>4</sub> ]@ZIF-8 (high) |                                  |
| <i>P</i> (bar)                                            | <i>q</i> <sub>exc</sub> (mol/kg) | <i>P</i> (bar)                                        | <i>q</i> <sub>exc</sub> (mol/kg) | <i>P</i> (bar)                                         | <i>q</i> <sub>exc</sub> (mol/kg) |
| 0.151                                                     | 0.064                            | 0.499                                                 | 0.212                            | 0.151                                                  | 0.055                            |
| 0.300                                                     | 0.134                            | 1.000                                                 | 0.435                            | 0.300                                                  | 0.116                            |
| 0.517                                                     | 0.240                            | 3.035                                                 | 1.342                            | 0.517                                                  | 0.203                            |
| 0.706                                                     | 0.333                            | 6.026                                                 | 2.571                            | 0.706                                                  | 0.282                            |
| 0.850                                                     | 0.405                            | 7.995                                                 | 3.207                            | 0.850                                                  | 0.342                            |
| 1.001                                                     | 0.481                            | 12.062                                                | 4.090                            | 1.001                                                  | 0.406                            |
| 2.096                                                     | 1.051                            | 15.881                                                | 4.589                            | 2.096                                                  | 0.878                            |
| 4.007                                                     | 2.088                            | 9.969                                                 | 3.707                            | 4.007                                                  | 1.727                            |
| 6.972                                                     | 3.502                            | 4.519                                                 | 2.010                            | 6.972                                                  | 2.918                            |
| 9.981                                                     | 4.512                            | 1.971                                                 | 0.886                            | 9.981                                                  | 3.726                            |
| 5.334                                                     | 2.772                            | 0.699                                                 | 0.337                            | 5.334                                                  | 2.294                            |
| 2.991                                                     | 1.547                            |                                                       |                                  | 2.991                                                  | 1.289                            |
| 1.502                                                     | 0.745                            |                                                       |                                  | 1.502                                                  | 0.628                            |
| 0.589                                                     | 0.283                            |                                                       |                                  | 0.589                                                  | 0.239                            |
| 0.098                                                     | 0.046                            |                                                       |                                  | 0.098                                                  | 0.042                            |

**S2. Single-component CO<sub>2</sub>,CH<sub>4</sub> and N<sub>2</sub> adsorption-desorption data of ZIF-8 and [C<sub>6</sub>MIM][B(CN)<sub>4</sub>]@ZIF-8 (low) at 273 K**

**Table S4.** CO<sub>2</sub> adsorption-desorption equilibrium data at 273 K for pristine ZIF-8 and [C<sub>6</sub>MIM][B(CN)<sub>4</sub>]@ZIF-8 (low).

| CO <sub>2</sub> – 273 K |                                  |                                                       |                                  |
|-------------------------|----------------------------------|-------------------------------------------------------|----------------------------------|
| ZIF-8                   |                                  | [C <sub>6</sub> MIM][B(CN) <sub>4</sub> ]@ZIF-8 (low) |                                  |
| <i>P</i> (bar)          | <i>q</i> <sub>exc</sub> (mol/kg) | <i>P</i> (bar)                                        | <i>q</i> <sub>exc</sub> (mol/kg) |
| 0.143                   | 0.167                            | 0.143                                                 | 0.125                            |
| 0.291                   | 0.357                            | 0.291                                                 | 0.278                            |
| 0.431                   | 0.534                            | 0.431                                                 | 0.422                            |
| 0.574                   | 0.725                            | 0.574                                                 | 0.559                            |
| 0.711                   | 0.917                            | 0.711                                                 | 0.712                            |
| 0.860                   | 1.137                            | 0.860                                                 | 0.882                            |
| 1.002                   | 1.353                            | 1.002                                                 | 1.048                            |
| 2.981                   | 4.534                            | 2.981                                                 | 3.479                            |
| 6.089                   | 7.280                            | 6.089                                                 | 5.765                            |
| 8.112                   | 8.071                            | 8.112                                                 | 6.468                            |
| 12.040                  | 8.884                            | 12.040                                                | 7.226                            |
| 16.092                  | 9.289                            | 16.092                                                | 7.660                            |
| 9.973                   | 8.575                            | 9.973                                                 | 6.956                            |
| 4.545                   | 6.419                            | 4.545                                                 | 5.081                            |
| 2.066                   | 3.081                            | 2.066                                                 | 2.397                            |
| 0.928                   | 1.311                            | 0.928                                                 | 1.038                            |
| 0.778                   | 1.091                            | 0.778                                                 | 0.865                            |
| 0.641                   | 0.893                            | 0.641                                                 | 0.706                            |
| 0.506                   | 0.682                            | 0.506                                                 | 0.541                            |
| 0.359                   | 0.489                            | 0.359                                                 | 0.390                            |
| 0.210                   | 0.296                            | 0.210                                                 | 0.231                            |
| 0.069                   | 0.112                            | 0.069                                                 | 0.084                            |
